# Supplementary material
Source: MDPI journal article supplement (https://www.mdpi.com/2304-6740/11/2/79)
Supplement: s1 [file s1 › inorganics-2147039-supplementary.pdf]

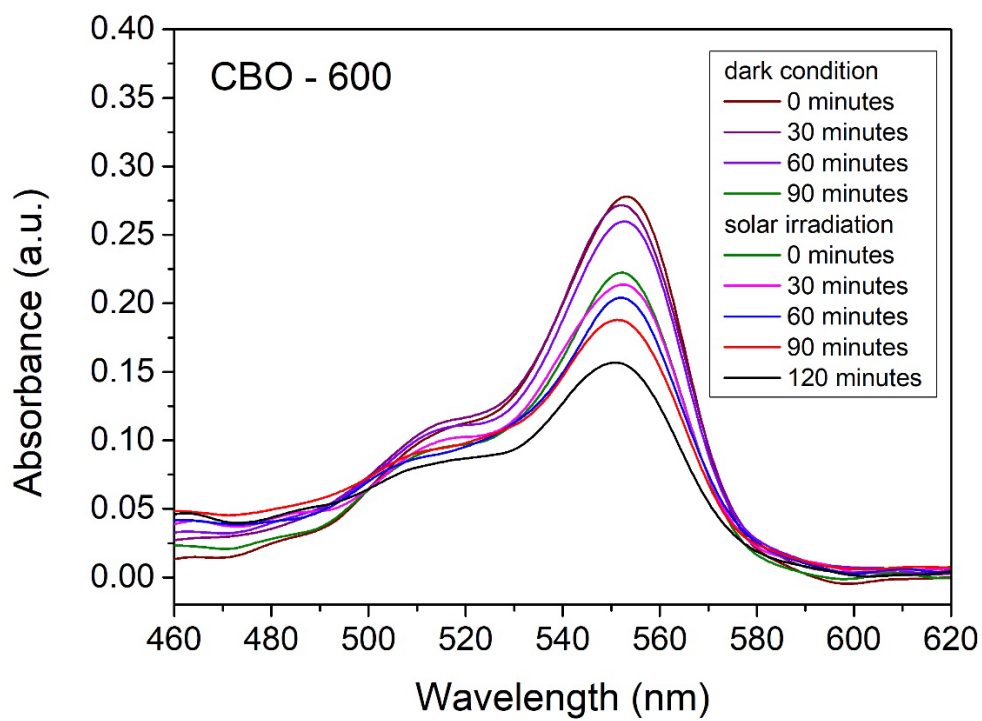

(a)

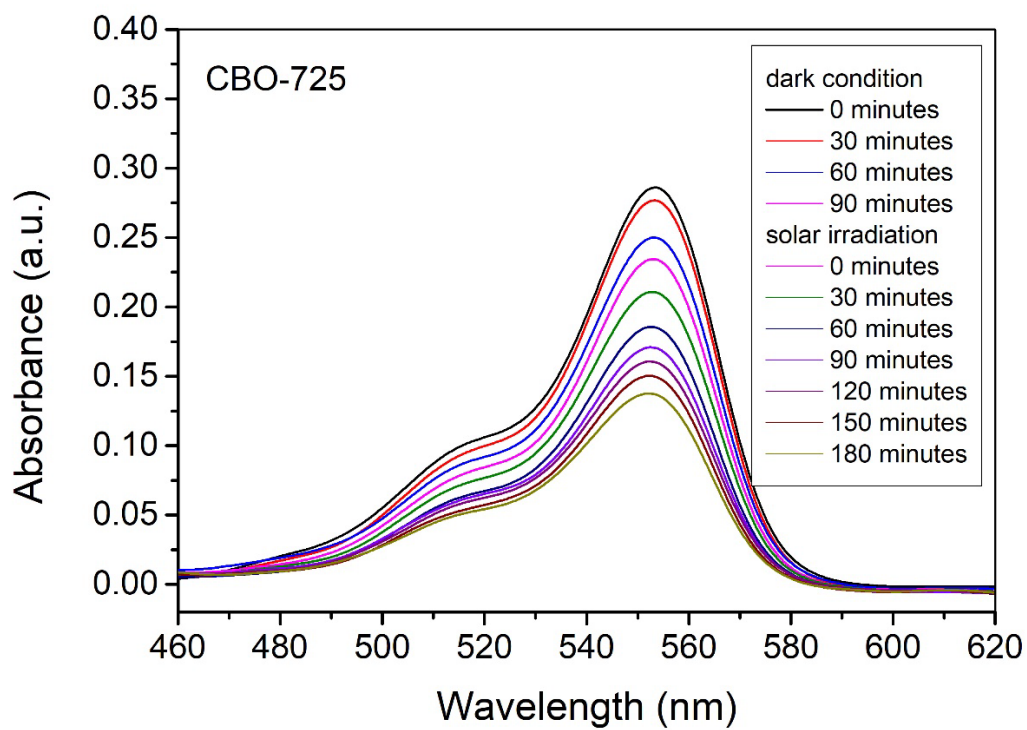

(b)

**Figure S1.** Variations of RhB corresponding visible absorbance peak for (a) CBO-600 and for (b) CBO-775.

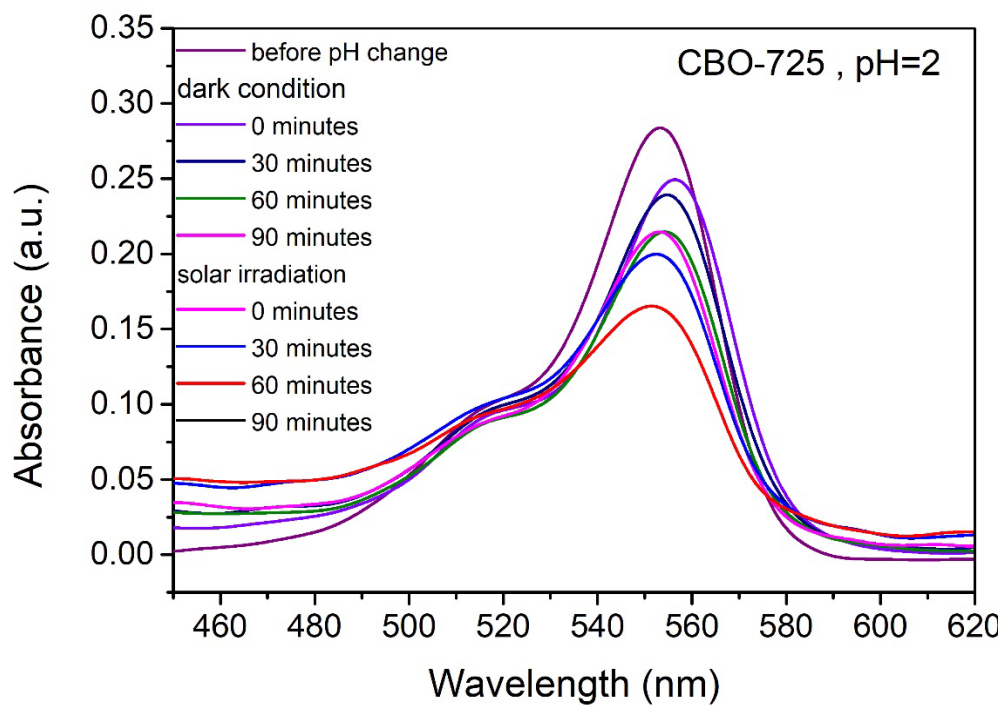

(a)

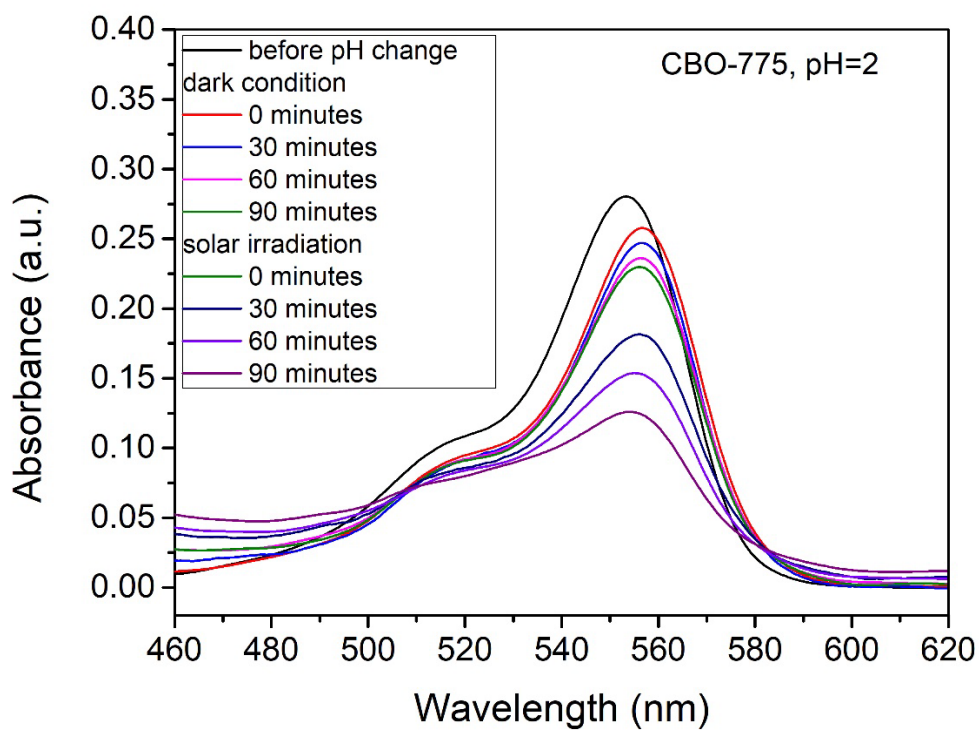

(b)

**Figure S2.** Variations of RhB corresponding visible absorbance peak for (a) CBO-725 and for (b) CBO-775 at pH=2

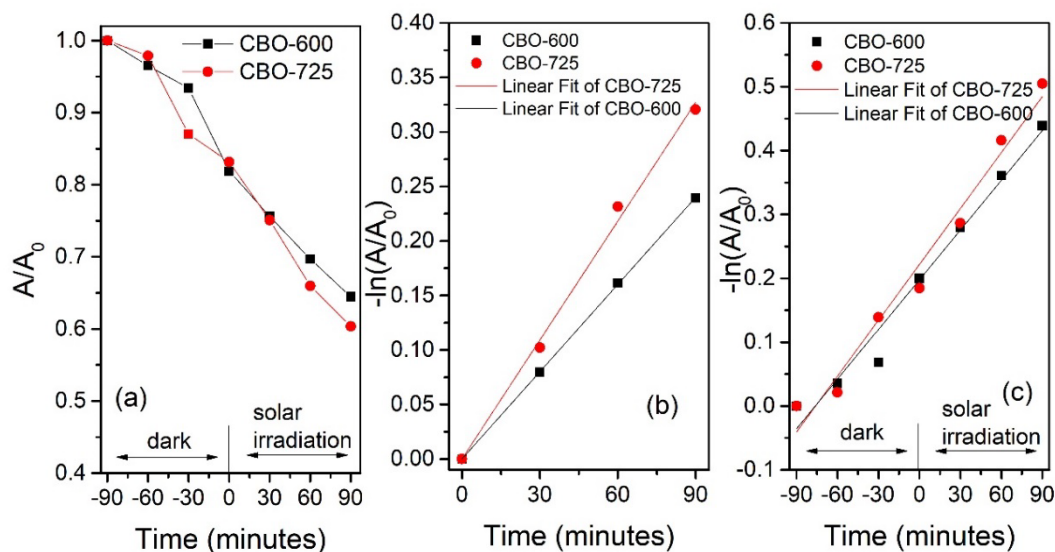

**Figure S3.** (a) RhB removal curves over CBO-600 and CBO-725 at normal pH – 5; (b) the corresponding pseudo-first-order kinetic curve from 0 to 90 minutes; (c) the corresponding pseudo-first-order kinetic curve from -90 to 90 minutes.

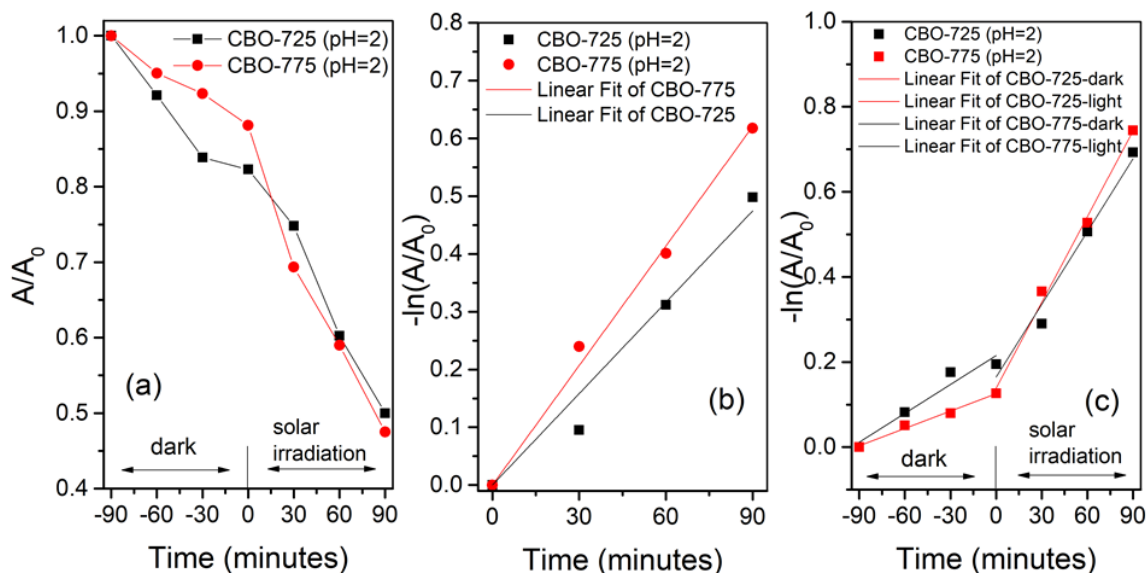

**Figure S4.** (a) RhB removal curves over CBO-725 and CBO-775 at pH=2 and (b) the corresponding pseudo-first-order kinetic curve from 0 to 90 minutes; (c) the corresponding pseudo-first-order kinetic curves from -90 to 90 minutes.

**Table S1.** Table 3. Kinetic parameters resulted in the linear plotting of the first order reaction for photodegradation RhB over all materials from 0 to 90 minutes and from -90 and 90 minutes respectively

| Catalyst | Fitting parameters (first order reaction) |                |                        |                |
|----------|-------------------------------------------|----------------|------------------------|----------------|
|          | k (min <sup>-1</sup> )                    | R <sup>2</sup> | k (min <sup>-1</sup> ) | R <sup>2</sup> |
| pH=5     | From 0 to 90 minutes                      |                | From -90 to 90 minutes |                |
| CBO-600  | 0.0027                                    | 0.9999         | 0.0026                 | 0.9716         |
| CBO-725  | 0.0036                                    | 0.9978         | 0.0029                 | 0.9725         |
| pH=2     |                                           |                |                        |                |
| CBO-725  | 0.0053                                    | 0.9830         | 0.0023 (dark)          | 0.9157         |
|          |                                           |                | 0.0057 (light)         | 0.9677         |
| CBO-775  | 0.0069                                    | 0.9973         | 0.0014 (dark)          | 0.9845         |
|          |                                           |                | 0.0067 (light)         | 0.9975         |
